# Supplementary material for: Immunostimulatory RNA leads to functional reprogramming of myeloid-derived suppressor cells in pancreatic cancer
Source: PubMed Central journal article supplement (PMC6836385; doi:10.1186/s40425-019-0778-7), 2019-11-06

# Figure S1

## Spleen

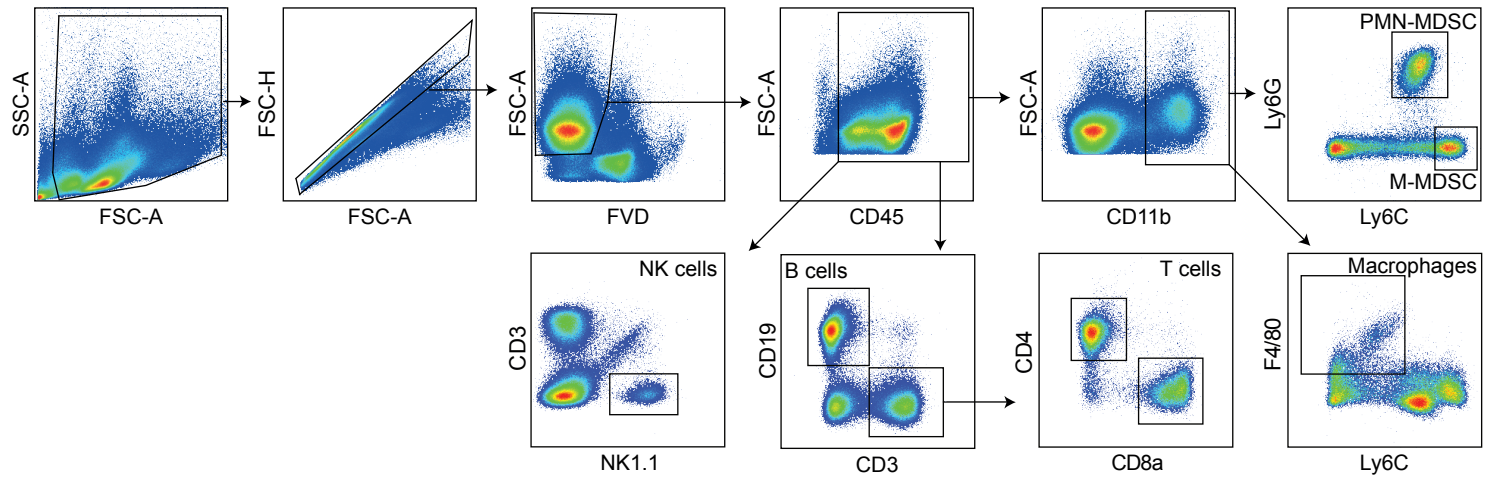

## Tumor

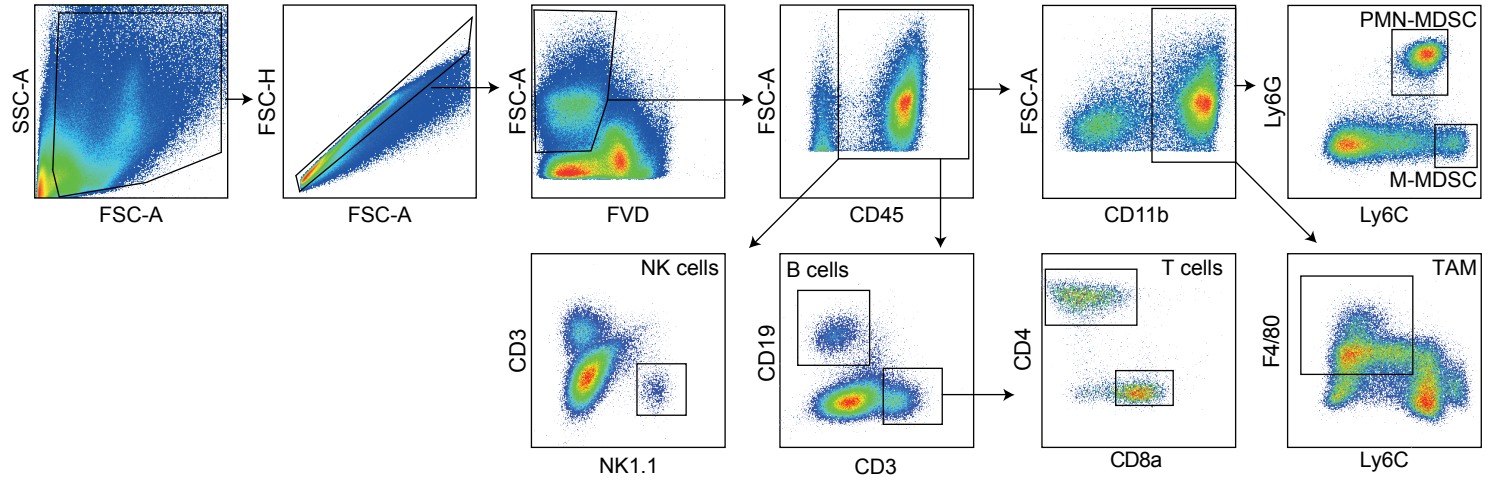

**Figure S2**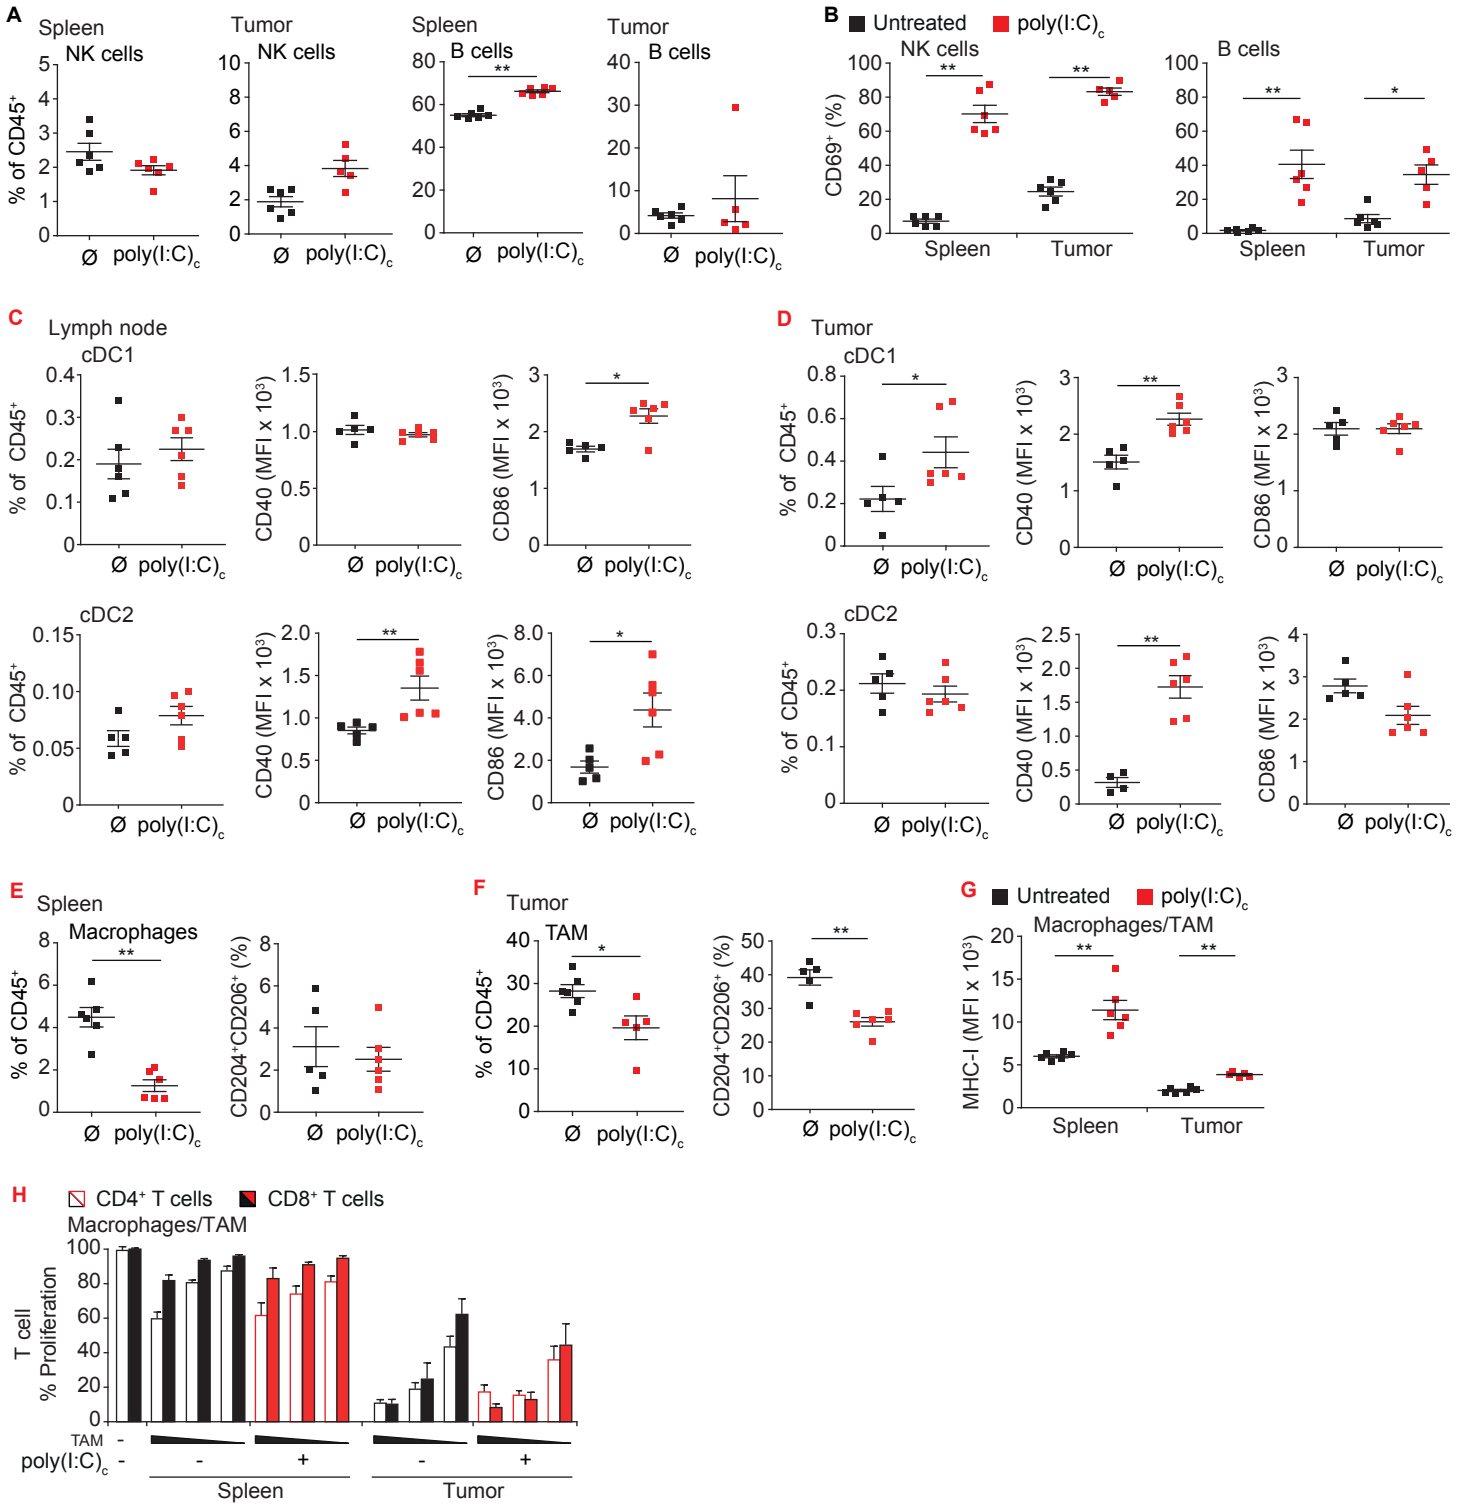

**Figure S3**

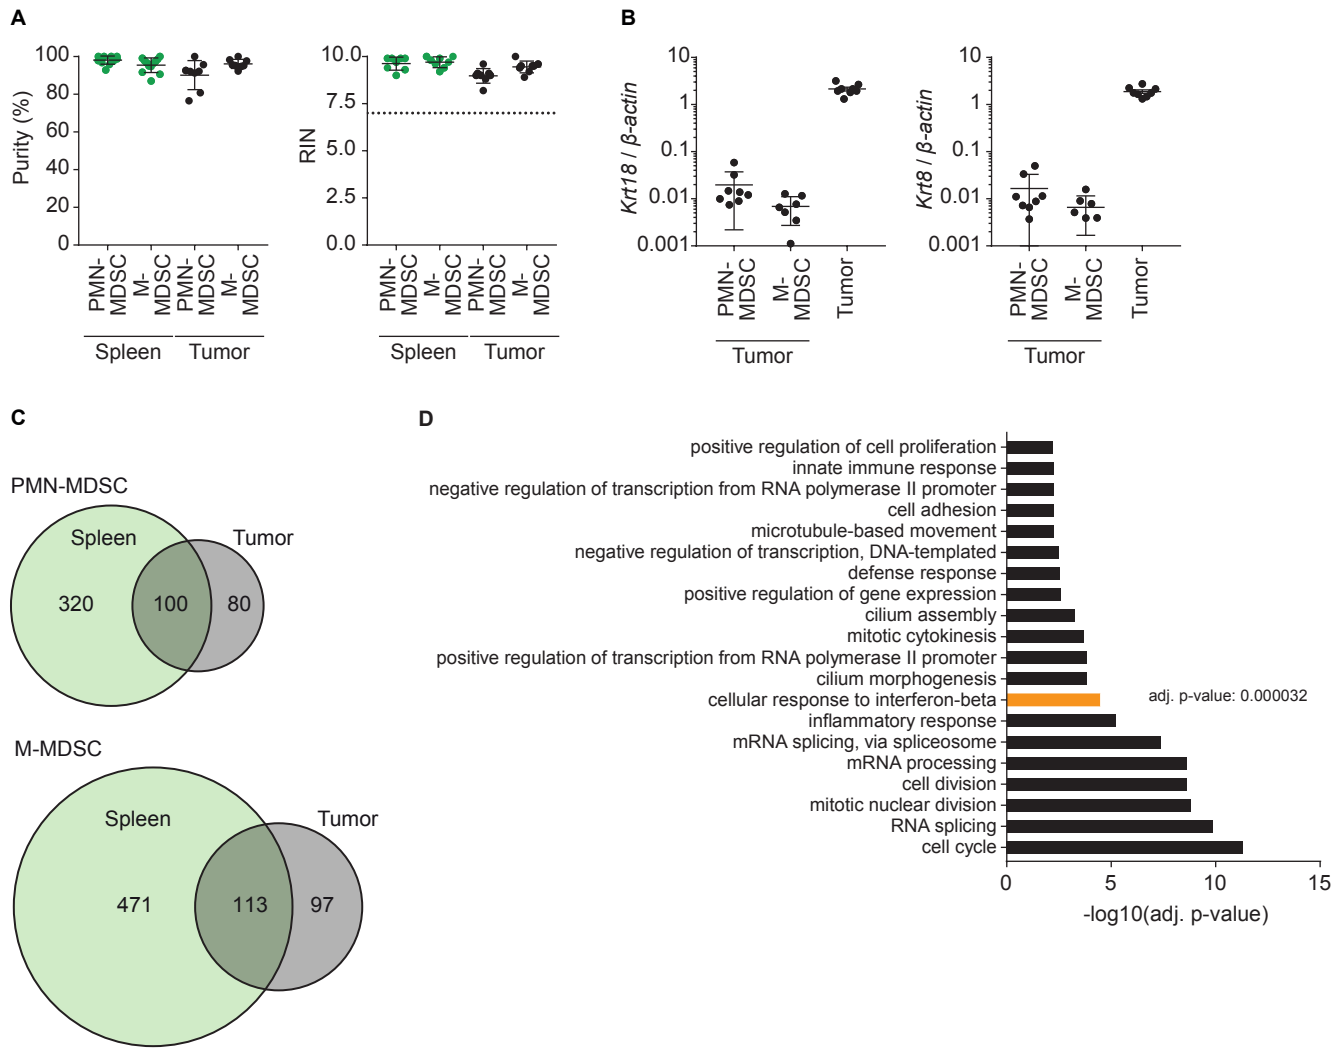

Figure S4

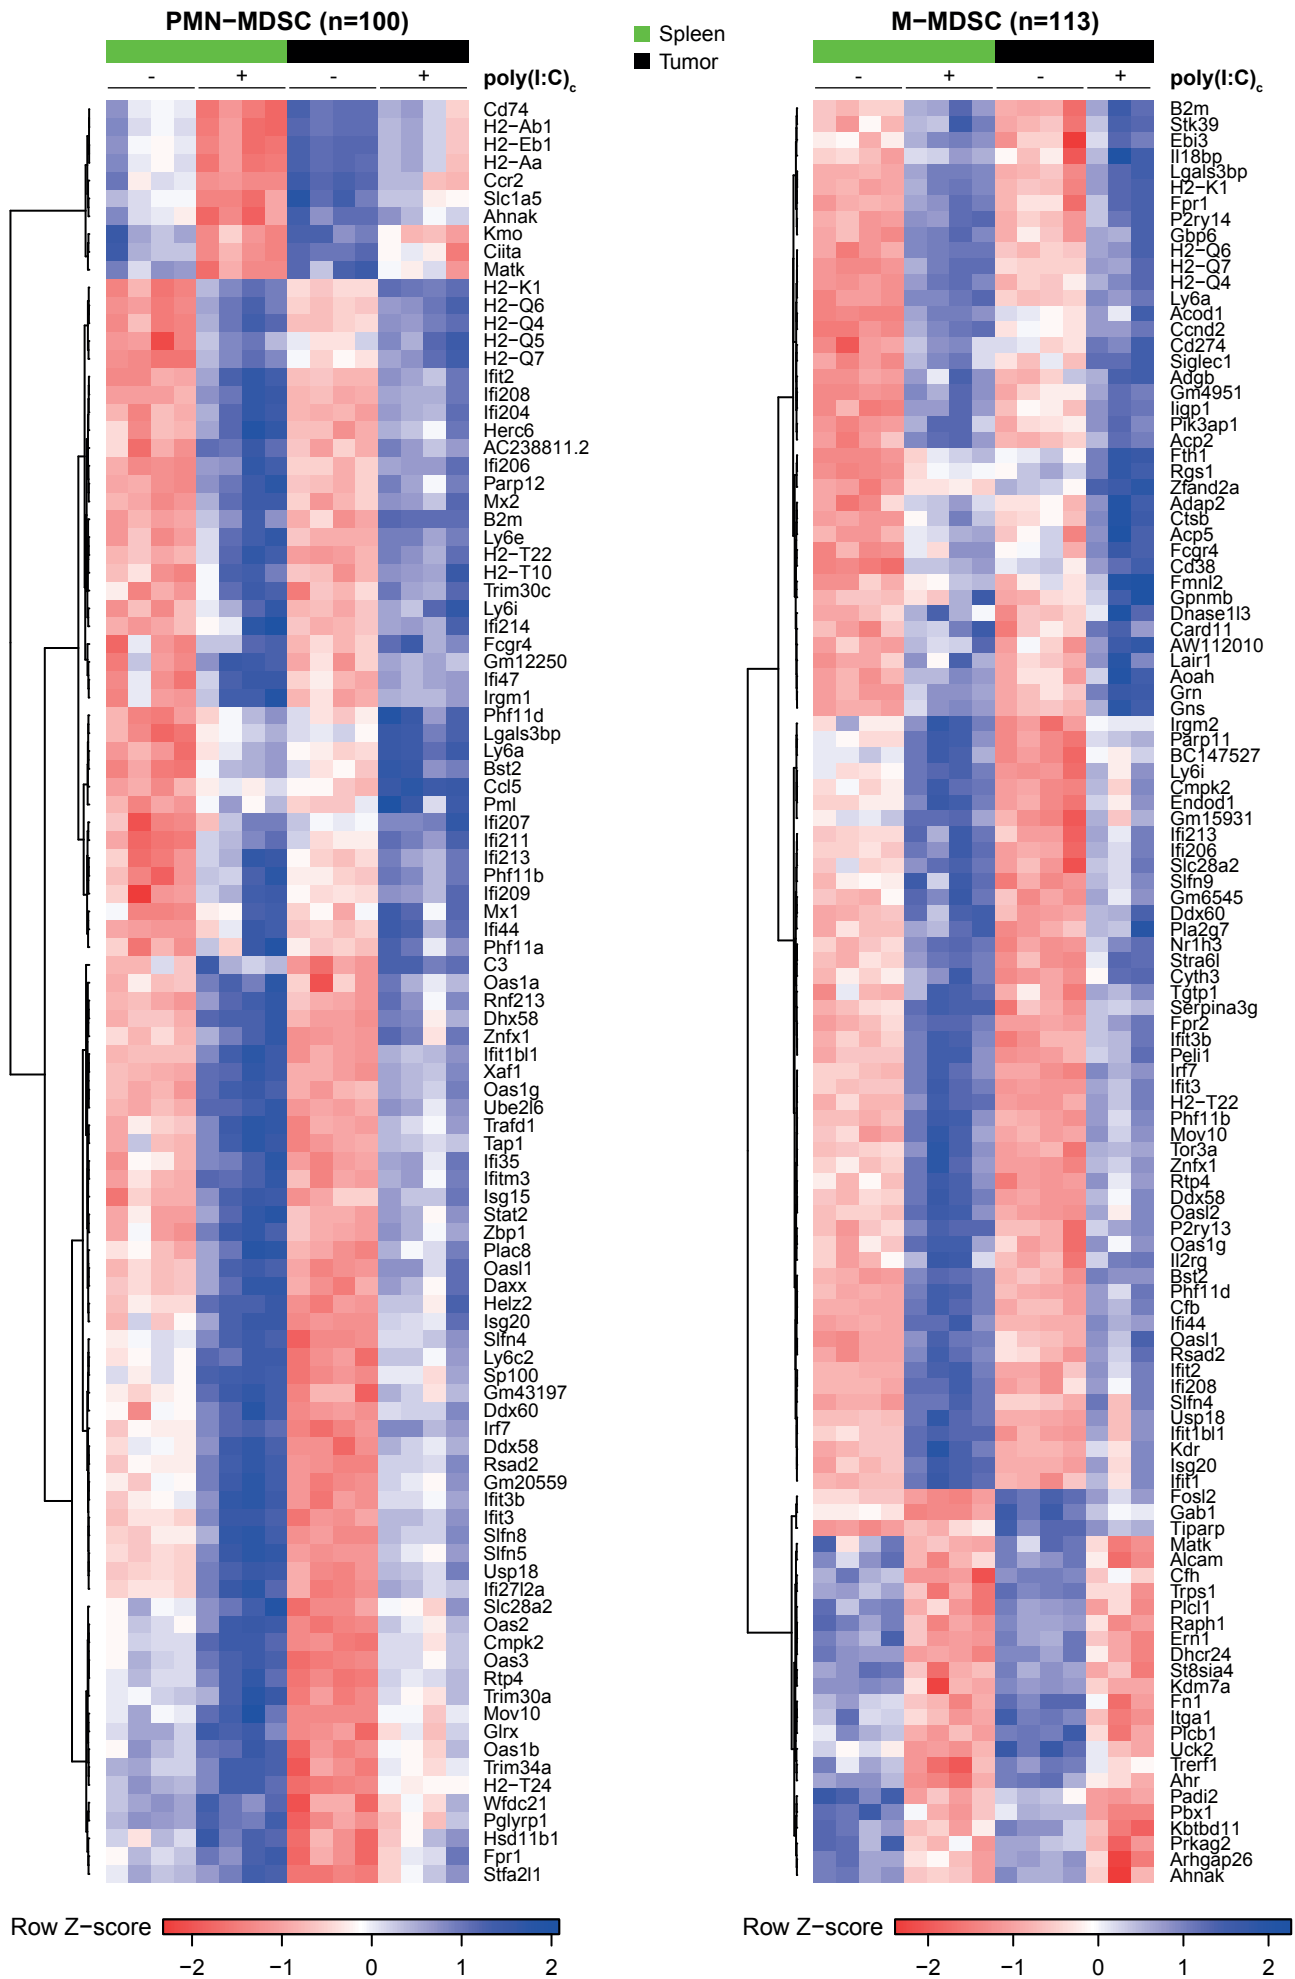

Supplement: 40425_2019_778_MOESM1_ESM.pdf [file 40425_2019_778_MOESM1_ESM.pdf]
